# Supplementary material for: The NALCN channel regulates metastasis and nonmalignant cell dissemination
Source: Springer Nature journal article supplement (doi:10.1038/s41588-022-01182-0), 2022-09-29
Supplement: MOESM12 [file 41588_2022_1182_MOESM12_ESM.pdf]

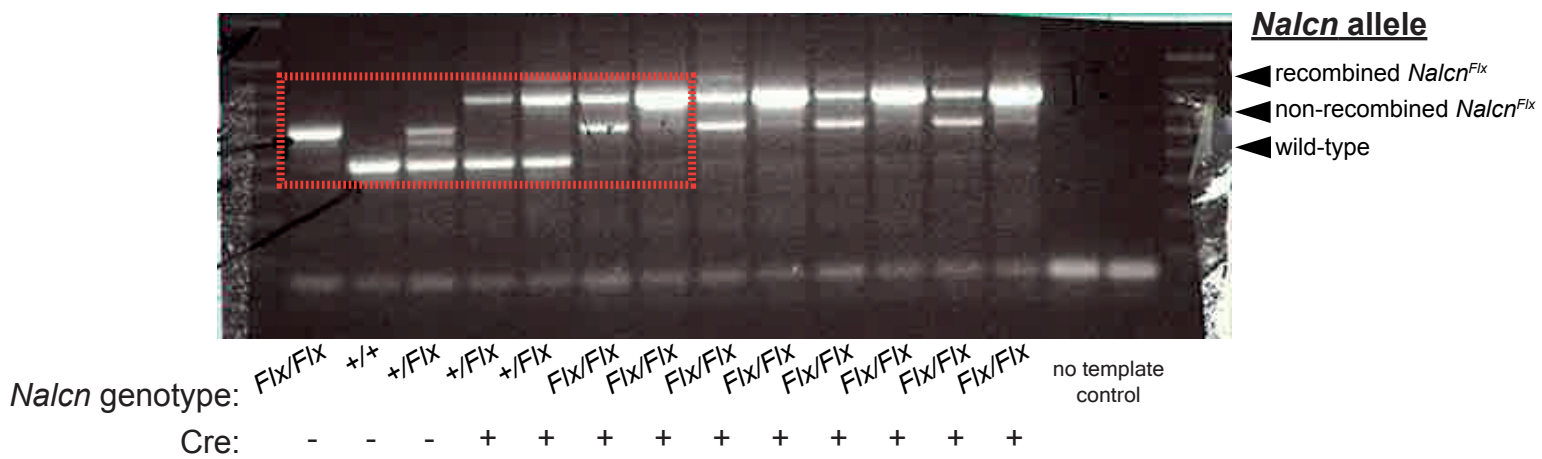

**Source data EXTENDED DATA FIG 2A: uncropped gel image of Extended Data FIG 2a.** Polymerase chain reaction (PCR) products derived from brains of *Nalcn*<sup>+/+</sup>, *Nalcn*<sup>+/*Flox*</sup>, or *Nalcn*<sup>*Flox/Flox*</sup> mice with or without the NestinCre allele. 1% agarose gel was used to resolve bands with a 100bp DNA ladder as reference point. wild-type band 389bp, non-recombined *Nalcn*<sup>Flox</sup> band 494bp, recombined *Nalcn*<sup>Flox</sup> band 651bp. Area cropped for Extended Data FIG 3a highlighted with dashed box in red.
